# Supplementary material for: Morphological and Molecular Characterization of Calonectria foliicola Associated with Leaf Blight on Rubber Tree (Hevea brasiliensis) in Thailand
Source: MDPI journal article supplement (doi:10.3390/jof8100986), 2022-09-20
Supplement: s1 [file s1]

**Table S1.** Sequences from GenBank used in phylogenetic tree analysis.

| Species                           | Isolate                                        | Location                                         | Substrate                                                      | GenBank Accession number |             |            |               |
|-----------------------------------|------------------------------------------------|--------------------------------------------------|----------------------------------------------------------------|--------------------------|-------------|------------|---------------|
|                                   |                                                |                                                  |                                                                | ITS                      | <i>tub2</i> | <i>cal</i> | <i>tef1-α</i> |
| <i>Calonectria auriculiformis</i> | CBS 143561 <sup>T</sup> = CMW 47178            | Hau Loc, Thanh Hoa, Vietnam                      | Soil in <i>Acacia auriculiformis</i> plantation                | MT359651                 | MH119287    | MH119254   | MH119221      |
|                                   | CBS 143562 = CMW 47179                         | Hau Loc, Thanh Hoa, Vietnam                      | Soil in <i>Acacia auriculiformis</i> plantation                | MT359652                 | MH119288    | MH119255   | MH119222      |
| <i>Ca. brasiliensis</i>           | CBS 230.51 <sup>T</sup>                        | Aracruz nursery, Brazil                          | Leaves of <i>Eucalyptus</i> sp.                                | MT359661                 | GQ267241    | MT335200   | GQ267328      |
|                                   | CBS 114257                                     | Aracruz nursery, Brazil                          | Leaves of <i>Eucalyptus</i> sp.                                | GQ280625                 | GQ267242    | GQ267422   | GQ267329      |
| <i>Ca. candelabra</i>             | CPC 1675                                       | -                                                | -                                                              | -                        | FJ972426    | GQ267367   | FJ972525      |
|                                   | CMW 31001 = CSF11405                           | -, Brazil                                        | <i>Eucalyptus</i> sp.                                          | MT359669                 | GQ421779    | MT335208   | -             |
| <i>Ca. cerciana</i>               | CBS 123693 <sup>T</sup> =CMW 25309             | Guangdong Province, China                        | <i>Eucalyptus urophylla</i> × <i>E. grandis</i>                | MH863319                 | FJ918510    | GQ267369   | FJ918559      |
|                                   | CBS 123695=CMW 25290                           | Guangdong Province, China                        | <i>Eucalyptus urophylla</i> × <i>E. grandis</i>                | MT359673                 | FJ918511    | GQ267370   | FJ918560      |
| <i>Ca. cylindrospora</i>          | CBS 110666                                     | -, USA                                           | -                                                              | GQ280626                 | FJ918509    | GQ267423   | FJ918557      |
|                                   | CBS 119670                                     | nursery Universita degli Studi di Catania, Italy | Symptomatic leaf and stem tissues of <i>Pistacia lentiscus</i> | KY653251                 | DQ521600    | MT335236   | GQ421797      |
| <i>Ca. foliicola</i>              | CBS 136641 = CERC 1728 = CMW 31393 = CPC 23491 | Guangxi Province, China                          | <i>Eucalyptus urophylla</i> × <i>E. grandis</i> clone          | -                        | KJ462916    | KJ463031   | KJ462800      |
|                                   | CERC 1729 = CMW 31394 = CPC 23492              | Guangxi Province, China                          | <i>Eucalyptus urophylla</i> × <i>E. grandis</i> clone          | -                        | KJ462917    | KJ463032   | KJ462801      |
|                                   | CERC 1730 = CMW 31395                          | Guangxi Province, China                          | <i>Eucalyptus urophylla</i> × <i>E. grandis</i> clone          | MT359709                 | KJ462918    | KJ463033   | KJ462802      |
|                                   | Calokb001                                      | Krabi Province, Thailand                         | <i>Hevea brasiliensis</i> leaf                                 | LC721579                 | LC721587    | LC721575   | LC721583      |
| <i>Ca. hodgesii</i>               | Calokb002                                      | Krabi Province, Thailand                         | <i>Hevea brasiliensis</i> leaf                                 | LC721580                 | LC721588    | LC721576   | LC721584      |
|                                   | Calokb003                                      | Krabi Province, Thailand                         | <i>Hevea brasiliensis</i> leaf                                 | LC721581                 | LC721589    | LC721577   | LC721585      |
|                                   | Calokb004                                      | Krabi Province, Thailand                         | <i>Hevea brasiliensis</i> leaf                                 | LC721582                 | LC721590    | LC721578   | LC721586      |
|                                   | CBS 133609 <sup>T</sup>                        | Minas Gerais, Vicosa, Brazil                     | Root of <i>Anadenanthera peregrina</i> seedlings               | -                        | KC491228    | KC491222   | KC491225      |
| <i>Ca. insularis</i>              | CBS 133608                                     | -, Brazil                                        | Stem of <i>Piptadenia gonoacantha</i>                          | -                        | KC491227    | KC491221   | KC491224      |
|                                   | CBS 133610                                     | -, Brazil                                        | Leaf of <i>Azadirachta indica</i>                              | -                        | KC491229    | KC491223   | KC491226      |
|                                   | CBS 114558 <sup>T</sup>                        | Tamatava, Madagascar                             | Soil                                                           | GQ280587                 | -           | GQ267389   | FJ918556      |

|                           |                                                 |                                    |                                 |          |          |          |          |
|---------------------------|-------------------------------------------------|------------------------------------|---------------------------------|----------|----------|----------|----------|
| <i>Ca. maranhensis</i>    | CBS 114559                                      | Tamatava, Madagascar               | Soil                            | GQ280588 | -        | GQ267390 | FJ918555 |
|                           | CBS 134811 <sup>T</sup>                         | Açailândia, Brazil                 | Eucalyptus leaf                 | -        | KM395948 | KM396035 | KM395861 |
|                           | CBS 134829                                      | Urbano Santos, Brazil              | Soil                            | -        | KM395952 | KM396039 | KM395865 |
| <i>Ca. papillata</i>      | CBS 136097 <sup>T</sup> = CPC 23517             | Guangdong Province, China          | Soil                            | KY653267 | KJ462964 | KJ463079 | KJ462849 |
|                           | CBS 136084                                      | Guangdong Province, China          | Soil in Eucalyptus plantation   | -        | KJ462962 | KJ463077 | KJ462847 |
|                           | CBS 136096                                      | Guangdong Province, China          | Soil in Eucalyptus plantation   | KY653266 | KJ462963 | KJ463078 | KJ462848 |
|                           | CBS 136251                                      | Guangdong Province, China          | Soil in Eucalyptus plantation   | -        | KJ462965 | KJ463080 | KJ462850 |
| <i>Ca. polizzii</i>       | CBS 123402 <sup>T</sup> = CMW 7804              | Sicily, Carrubba, Italy            | <i>Arbutus unedo</i>            | GQ280666 | FJ972417 | GQ267461 | FJ972486 |
| <i>Ca. propaginicola</i>  | CBS 134815 <sup>T</sup>                         | Santana, Brazil                    | Eucalyptus                      | -        | KM395953 | KM396040 | KM395866 |
|                           | CBS 134820                                      | Santana, Paía, Brazil              | Used planting substrate         | -        | KM395956 | KM396043 | KM395869 |
|                           | CBS 134821                                      | Santana, Paía, Brazil              | Used planting substrate         | -        | KM395957 | KM396044 | KM395870 |
| <i>Ca. pseudocerciana</i> | CBS 134824                                      | Santana, Paía, Brazil              | Eucalyptus seedling             | -        | KM395962 | KM396049 | KM395875 |
| <i>Ca. pseudohodgesii</i> | CBS 134818                                      | Minas Gerais state, Viçosa, Brazil | <i>Azadirachta indica</i>       | -        | KM395903 | KM395989 | KM395815 |
|                           | CBS 134819                                      | Minas Gerais state, Viçosa, Brazil | <i>Azadirachta indica</i>       | -        | KM395906 | KM395992 | KM395818 |
| <i>Ca. sulawesiensis</i>  | CBS 125277 <sup>T</sup> = CMW 14878             | Sulawesi, Indonesia                | Leaves of <i>Eucalyptus</i> sp. | GQ280635 | GQ267220 | GQ267432 | GQ267340 |
|                           | CBS 125253 = CMW 14879                          | Sulawesi, Indonesia                | Leaves of <i>Eucalyptus</i> sp. | GQ280637 | GQ267222 | GQ267434 | GQ267342 |
| <i>Ca. terrestris</i>     | CBS 136642 <sup>T</sup> = CERC 1856 = CMW 35180 | Guangdong Province, China          | Soil                            | -        | KJ463004 | KJ463121 | KJ462891 |
|                           | CBS 136643 = CERC 1868 = CMW 35364 = CPC 23493  | Guangdong Province, China          | Soil                            | -        | KJ463005 | KJ463122 | KJ462892 |
|                           | CBS 136644 = CERC 1870 = CMW 35366 = CPC 23494  | Guangdong Province, China          | Soil                            | -        | KJ463006 | KJ463123 | KJ462893 |
|                           | CBS 136645 = CERC 1854 = CMW 35178 = CPC 23496  | Guangdong Province, China          | Soil                            | -        | KJ463007 | KJ463124 | KJ462894 |
|                           | CBS 136651 = CERC 1937 = CMW 37974 = CPC 23516  | Guangdong Province, China          | Soil                            | -        | KJ463009 | KJ463126 | KJ462896 |

|                                        |                                                                   |                           |                                                                 |          |          |          |          |
|----------------------------------------|-------------------------------------------------------------------|---------------------------|-----------------------------------------------------------------|----------|----------|----------|----------|
| <i>Ca. tetraramosa</i>                 | CBS 136635 <sup>T</sup> = CERC<br>1809 = CMW 31474 =<br>CPC 23489 | Guangdong Province, China | <i>Eucalyptus urophylla</i> x <i>E.</i><br><i>grandis</i> clone | KY653282 | KJ463011 | KJ463128 | KJ462898 |
|                                        | CBS 136637                                                        | Guangdong Province, China | <i>Eucalyptus urophylla</i> x <i>E.</i><br><i>grandis</i> clone | -        | KJ463012 | KJ463129 | KJ462899 |
| <i>Curviciadiella</i><br><i>cignea</i> | CBS 101411                                                        | -, French Guiana          | Decaying seed                                                   | KM231744 | KM232001 | KM231285 | KM231866 |
|                                        | CBS 109167 <sup>T</sup>                                           | -, French Guiana          | Leaf litter                                                     | -        | KM232002 | KM231287 | KM231867 |

T=Ex-type strain, Isolates obtained in this study are indicated in **bold**, - : Not available
